# Supplementary material
Source: publisher figshare collection journal article supplement (https://sage.figshare.com/ndownloader/files/15473183)
Supplement: Supplementary file 1 [file 15473183]

require(psych)
require(lmerTest)
setwd("~/ownCloud/EdiSync/Articles/PEB")
Data = read.csv("DataScored.csv")
Data$Current_Country = ifelse(Data$Current_Country == "United Kingdom", 1, 0)

alpha = function(columns){ 
  k = ncol(columns) 
  colVars = apply(columns, 2, var, na.rm=T) 
  total   = var(apply(columns, 1, sum, na.rm=T)) 
  (total - sum(colVars, na.rm=T)) / total * (k/(k-1)) 
} 

alpha(Data[,grep("Art", names(Data))])
alpha(Data[,grep("Emo", names(Data))])
alpha(Data[,grep("Adv", names(Data))])
alpha(Data[,grep("Int", names(Data))])
alpha(Data[,grep("Lib", names(Data))])
alpha(Data[,grep("Ima", names(Data))])
alpha(Data[,grep("Env", names(Data))])
alpha(Data[, 42:99])

## Delete variables not needed
Data = Data[,-c(1, 5, 7, 10:99)]


## get rid of one random triplet
triplets = names(table(Data$Nickname)[table(Data$Nickname) == 3])
for(i in triplets) {
  .tmp = rownames(Data)[Data$Nickname %in% i][sample(3,1)] 
  Data = Data[!rownames(Data) %in% .tmp,]
}


## Select only participants with siblings
sibs = names(table(Data$Nickname)[table(Data$Nickname) > 1])
Data = subset(Data, Nickname %in% sibs)
Data$Nickname = droplevels(Data$Nickname)

## Put the second to n'th member of each pair into Data2, keep the first instances in Data1

Data1 = subset(Data, duplicated(Nickname))
Data2 = subset(Data, !duplicated(Nickname))
rownames(Data1) = Data1$Nickname
rownames(Data2) = Data2$Nickname
Data2 = Data2[rownames(Data1),]
sum(Data1$Nickname == Data2$Nickname)

Data1$pair.id = 1:nrow(Data1)
Data2$pair.id = 1:nrow(Data2)

## Sinbling correlations

cor(Data1, Data2)

## A combined dataset (long format)

MLData = rbind(Data1, Data2)

Data1 = as.data.frame(apply(Data1[,7:14],2, scale))
Data2 = as.data.frame(apply(Data2[,7:14],2, scale))

PairDifs  = as.data.frame( apply( rbind(Data1 - Data2, Data1 - Data2) ,2,scale) )
PairMeans = as.data.frame( apply( rbind(Data1 + Data2, Data1 + Data2) ,2,scale) )

round(cor(PairDifs,  PairMeans,     use="pairwise"),3)
round(cor(PairDifs,  MLData[,7:14], use="pairwise"),3)
round(cor(PairMeans, MLData[,7:14], use="pairwise"),3)

round(cor(PairDifs[1:nrow(MLData)/2,], MLData[1:nrow(MLData)/2,7:14], use="pairwise"),3)
round(cor(PairDifs[nrow(MLData)/2 : nrow(MLData),], MLData[nrow(MLData)/2 : nrow(MLData),7:14], use="pairwise"),3)

## Correlations across the whole sample
summary(lmer(scale(Env_tot) ~ scale(Ope_tot) + Age + Gender + Education + SES + Current_Country + (1|pair.id), MLData))
.tmp = list(
lmer(scale(Env_tot) ~ scale(Ope_tot) + Age + Gender + Education + SES + Current_Country + (1|pair.id), MLData),
lmer(scale(Env_tot) ~ scale(Art_tot) + Age + Gender + Education + SES + Current_Country + (1|pair.id), MLData),
lmer(scale(Env_tot) ~ scale(Emo_tot) + Age + Gender + Education + SES + Current_Country + (1|pair.id), MLData),
lmer(scale(Env_tot) ~ scale(Adv_tot) + Age + Gender + Education + SES + Current_Country + (1|pair.id), MLData),
lmer(scale(Env_tot) ~ scale(Int_tot) + Age + Gender + Education + SES + Current_Country + (1|pair.id), MLData),
lmer(scale(Env_tot) ~ scale(Lib_tot) + Age + Gender + Education + SES + Current_Country + (1|pair.id), MLData),
lmer(scale(Env_tot) ~ scale(Ima_tot) + Age + Gender + Education + SES + Current_Country + (1|pair.id), MLData))

Whole = matrix(ncol=4, nrow=7)
for(i in 1:7) Whole[i,] = c(summary(.tmp[[i]])$coef[2,c(1,5)], confint(.tmp[[i]])[4,])
Whole = Whole[,c(1,3,4,2)]
colnames(Whole) = c("b", "ci1", "c2","p")

summary(lmer(scale(Env_tot) ~ PairDifs$Ope_tot + PairMeans$Ope_tot + Age + Gender + Education + SES + Current_Country + (1|pair.id), MLData))
.tmp = list(
lmer(scale(Env_tot) ~ PairDifs$Ope_tot + PairMeans$Ope_tot + Age + Gender + Education + SES + Current_Country + (1|pair.id), MLData),
lmer(scale(Env_tot) ~ PairDifs$Art_tot + PairMeans$Art_tot + Age + Gender + Education + SES + Current_Country + (1|pair.id), MLData),
lmer(scale(Env_tot) ~ PairDifs$Emo_tot + PairMeans$Emo_tot + Age + Gender + Education + SES + Current_Country + (1|pair.id), MLData),
lmer(scale(Env_tot) ~ PairDifs$Adv_tot + PairMeans$Adv_tot + Age + Gender + Education + SES + Current_Country + (1|pair.id), MLData),
lmer(scale(Env_tot) ~ PairDifs$Int_tot + PairMeans$Int_tot + Age + Gender + Education + SES + Current_Country + (1|pair.id), MLData),
lmer(scale(Env_tot) ~ PairDifs$Lib_tot + PairMeans$Lib_tot + Age + Gender + Education + SES + Current_Country + (1|pair.id), MLData),
lmer(scale(Env_tot) ~ PairDifs$Ima_tot + PairMeans$Ima_tot + Age + Gender + Education + SES + Current_Country + (1|pair.id), MLData))

Within = matrix(ncol=8, nrow=7)
for(i in 1:7) Within[i,1:4] = c(summary(.tmp[[i]])$coef[3,c(1,5)], confint(.tmp[[i]])[5,])
for(i in 1:7) Within[i,5:8] = c(summary(.tmp[[i]])$coef[2,c(1,5)], confint(.tmp[[i]])[4,])
Within = Within[,c(1,3,4,2,5,7,8,6)]

colnames(Within) = paste(rep(c("b", "ci1", "c2","p"),2), rep(c("between","within"), each=4), sep="_")

##Scatterplot
plot(MLData$Ope_tot, MLData$Env_tot, pch=20, xlab="Openness scores", ylab="PEB scores", xlim = c(1,6), ylim = c(1,6))
ablineclip(lm(MLData$Env_tot ~ MLData$Ope_tot), col = "red", x1 = min(MLData$Ope_tot), x2 = max(MLData$Ope_tot), y1 = min(MLData$Env_tot), y2=max(MLData$Env_tot))
